# Supplementary material for: Adjuvanted Vaccine Induces Functional Antibodies against Pseudomonas aeruginosa Filamentous Bacteriophages
Source: MDPI journal article supplement (doi:10.3390/vaccines12020115), 2024-01-24
Supplement: s1 [file s1]

# Adjuvanted vaccine induces functional antibodies against *Pseudomonas aeruginosa* filamentous bacteriophages

Valery C. Román-Cruz, Shannon M. Miller, Roman A. Schoener, Chase Lukasiewicz, Amelia Schmidt, Blair DeBuysscher, David Burkhardt, Patrick R. Secor, Jay T. Evans

## Supplemental Information:

**Supplemental Figure S1.** INI-2002 in combination with CoaB-CRM antigen promotes cell mediated immunity to CRM.

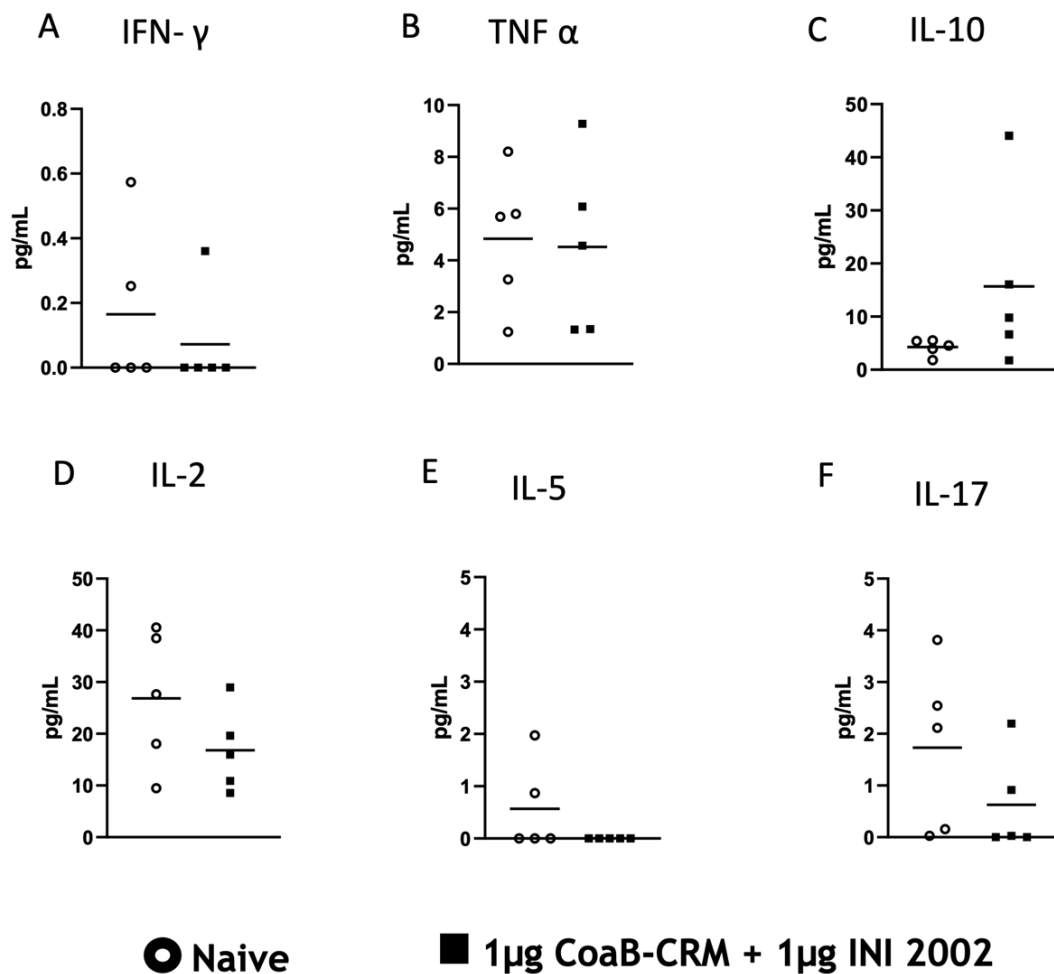

**Supplemental Figure S1.** INI-2002 in combination with CoaB-CRM antigen promotes cell mediated immunity to CRM. 5 days post-secondary vaccination mice were euthanized and spleens were harvested, disaggregated, and restimulated with 5 μg/mL of CRM-197. The following cytokines: IFNγ (a), TNFα (b), IL-10 (c), IL-2(d) IL-5 (e). IL-17 (f) were measured by MSD cytokine array.
